# Supplementary material
Source: Royal Society of Chemistry journal article supplement (doi:10.1039/d6ta02328b)
Supplement: d6ta02328b1.pdf [file d6ta02328b1.pdf]

## **Supporting Information**

### **Robust CO<sub>2</sub> Electrolysis via In-situ Interfacial Engineering with Exsolved Fe Nanoparticles on a Perovskite Cathode**

Yangyang Zhao, Yijian Wang, Xiaoyu Wang, Xingchen Feng, Tao Cong, Juntao  
Feng, Pei Wang, Kai Yang and Xifeng Ding\*

School of Materials Science and Engineering, Nanjing University of Science and  
Technology, Nanjing 210094, China.

\*Corresponding author: Xifeng Ding

Email address: dingxifeng@njust.edu.cn (X. Ding)

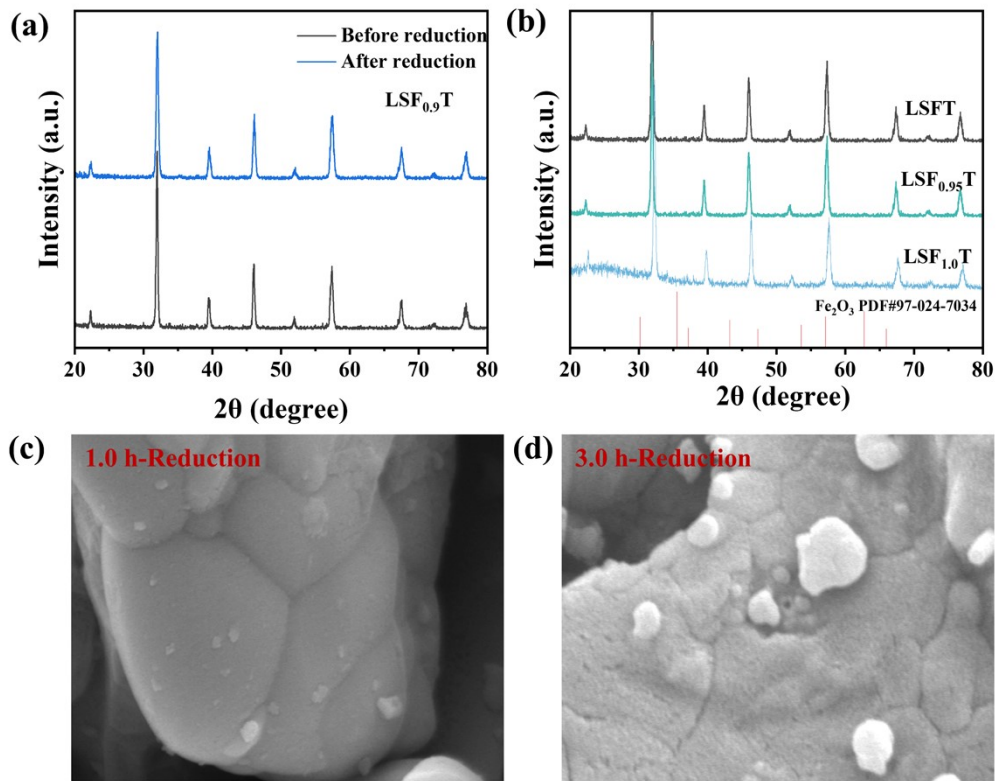

Fig. S1 (a) XRD patterns of  $\text{La}_{0.6}\text{Sr}_{0.4}\text{Fe}_{0.9}\text{Ti}_{0.2}\text{O}_{3-\delta}$  (LSF<sub>0.9</sub>T) before and after reduction. (b) XRD patterns of  $\text{La}_{0.6}\text{Sr}_{0.4}\text{Fe}_{0.8}\text{Ti}_{0.2}\text{O}_{3-\delta}$  (LSFT),  $\text{La}_{0.6}\text{Sr}_{0.4}\text{Fe}_{0.95}\text{Ti}_{0.2}\text{O}_{3-\delta}$  (LSF<sub>0.95</sub>T) and  $\text{La}_{0.6}\text{Sr}_{0.4}\text{Fe}_{1.0}\text{Ti}_{0.2}\text{O}_{3-\delta}$  (LSF<sub>1.0</sub>T). SEM images of LSF<sub>0.95</sub>T after (c) 1h and (d) 3 h reduction under 20% H<sub>2</sub>-80% Ar at 850 °C.

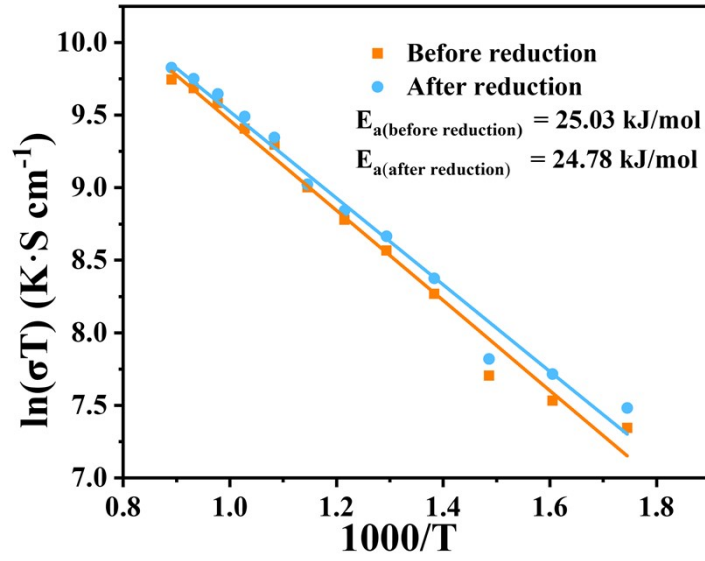

Fig. S2 Arrhenius plots of electrical conductivity for  $\text{LSF}_{0.95}\text{T}$  and  $\text{R-LSF}_{0.95}\text{T}$  in  $\text{CO}_2:\text{CO} = 1:1$

Table S1 Percentages of Fe valence distribution determined by Fe  $2p_{3/2}$  XPS fitting.

| Sample                        | Percentage       |                  |                  |               | Average valence |
|-------------------------------|------------------|------------------|------------------|---------------|-----------------|
|                               | $\text{Fe}^{4+}$ | $\text{Fe}^{3+}$ | $\text{Fe}^{2+}$ | $\text{Fe}^0$ |                 |
| $\text{LSF}_{0.95}\text{T}$   | 22.70%           | 52.76%           | 24.54%           | /             | 2.98            |
| $\text{R-LSF}_{0.95}\text{T}$ | 21.34%           | 35.90%           | 41.19%           | 1.57%         | 2.75            |

Table S2 Percentages of relative content of oxygen species determined by O 1s XPS fitting.

| Sample                        | Percentage |        |       |       |
|-------------------------------|------------|--------|-------|-------|
|                               | O1         | O2     | O3    | O2/O1 |
| $\text{LSF}_{0.95}\text{T}$   | 43.87%     | 49.05% | 7.08% | 1.12  |
| $\text{R-LSF}_{0.95}\text{T}$ | 39.25%     | 52.87% | 7.88% | 1.35  |

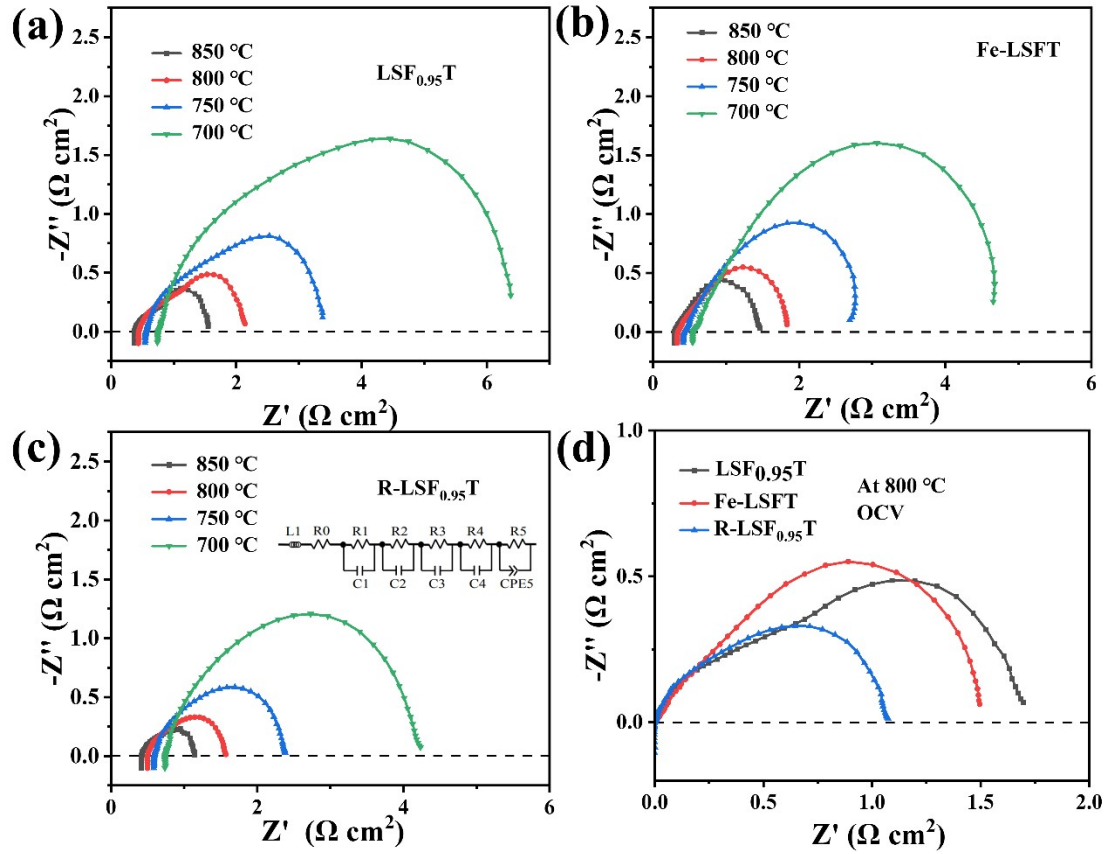

Fig. S3 EIS curves of cells (LSGM electrolyte, LSCF anode) with (a)  $\text{LSF}_{0.95}\text{T}$ , (b) Fe-LSFT or (c) R- $\text{LSF}_{0.95}\text{T}$  cathodes at 700-850°C and (d) at 800°C.

Table S3 Values of polarization resistance components obtained by equivalent circuit fitting ( $\Omega \text{ cm}^2$ ).

| samples                        | $R_1$ | $R_2$ | $R_3$ | $R_4$ | $R_5$ |
|--------------------------------|-------|-------|-------|-------|-------|
| $\text{LSF}_{0.95}\text{T}$    | 0.018 | 0.088 | 0.236 | 0.327 | 1.009 |
| Fe-LSFT                        | 0.018 | 0.080 | 0.163 | 0.202 | 1.093 |
| R- $\text{LSF}_{0.95}\text{T}$ | 0.014 | 0.063 | 0.120 | 0.186 | 0.671 |

Table S4 Current densities of SOECs with in-situ exsolved cathodes for CO<sub>2</sub> electrolysis at 800 °C and 1.5 V.

| Cathode                                                                                                                                                 | Electrolyte//Anode         | Current density<br>(A cm <sup>-2</sup> ) | Ref.         |
|---------------------------------------------------------------------------------------------------------------------------------------------------------|----------------------------|------------------------------------------|--------------|
| Cu-<br>(La <sub>0.75</sub> Sr <sub>0.25</sub> ) <sub>0.9</sub> Cr <sub>0.45</sub> Mn <sub>0.45</sub> Cu <sub>0.1</sub> O <sub>3-δ</sub>                 | YSZ (400μm)//<br>LSCrM-SDC | 0.24                                     | 38           |
| FeNi <sub>3</sub> -<br>La <sub>0.67</sub> Sr <sub>0.33</sub> Fe <sub>0.6</sub> Ni <sub>0.067</sub> Ti <sub>0.33</sub> O <sub>3-δ</sub>                  | LSGM (330μm<br>)//LSC      | 0.38                                     | 39           |
| Ni-<br>(La <sub>0.75</sub> Sr <sub>0.25</sub> ) <sub>0.9</sub> (Cr <sub>0.5</sub> Mn <sub>0.5</sub> ) <sub>0.9</sub> Ni <sub>0.1</sub> O <sub>3-δ</sub> | YSZ (300μm)//<br>LSM-SDC   | 0.2                                      | 40           |
| Ni-<br>(La <sub>0.2</sub> Sr <sub>0.8</sub> ) <sub>0.95</sub> Ti <sub>0.85</sub> Mn <sub>0.1</sub> Ni <sub>0.05</sub> O <sub>3+δ</sub>                  | YSZ (300μm)//LSM-<br>SDC   | 0.45                                     | 15           |
| Fe-(Ce <sub>0.08</sub> La <sub>0.52</sub> Sr <sub>0.3</sub> )C <sub>0.5</sub> Fe <sub>0.5</sub> O <sub>3-δ</sub>                                        | YSZ(120μm)//LSCF-<br>SDC   | 1.05                                     | 41           |
| Fe-La <sub>0.5</sub> Sr <sub>0.5</sub> FeO <sub>3-δ</sub>                                                                                               | LSGM<br>(250μm)//LSCF      | 1.13                                     | 42           |
| CoFe- La <sub>0.4</sub> Sr <sub>0.6</sub> Co <sub>0.2</sub> Fe <sub>0.7</sub> Mo <sub>0.1</sub> O <sub>3-δ</sub>                                        | LSGM<br>(250μm)//BSCF      | 1.21                                     | 12           |
| CoFe-Sr <sub>2</sub> Fe <sub>1.35</sub> Mo <sub>0.45</sub> Co <sub>0.2</sub> O <sub>6-δ</sub>                                                           | LSGM<br>(300μm)//BSCF      | 0.82                                     | 43           |
| R-LSF <sub>0.95</sub> T                                                                                                                                 | LSGM<br>(300μm)//LSCF      | 0.78                                     | This<br>work |

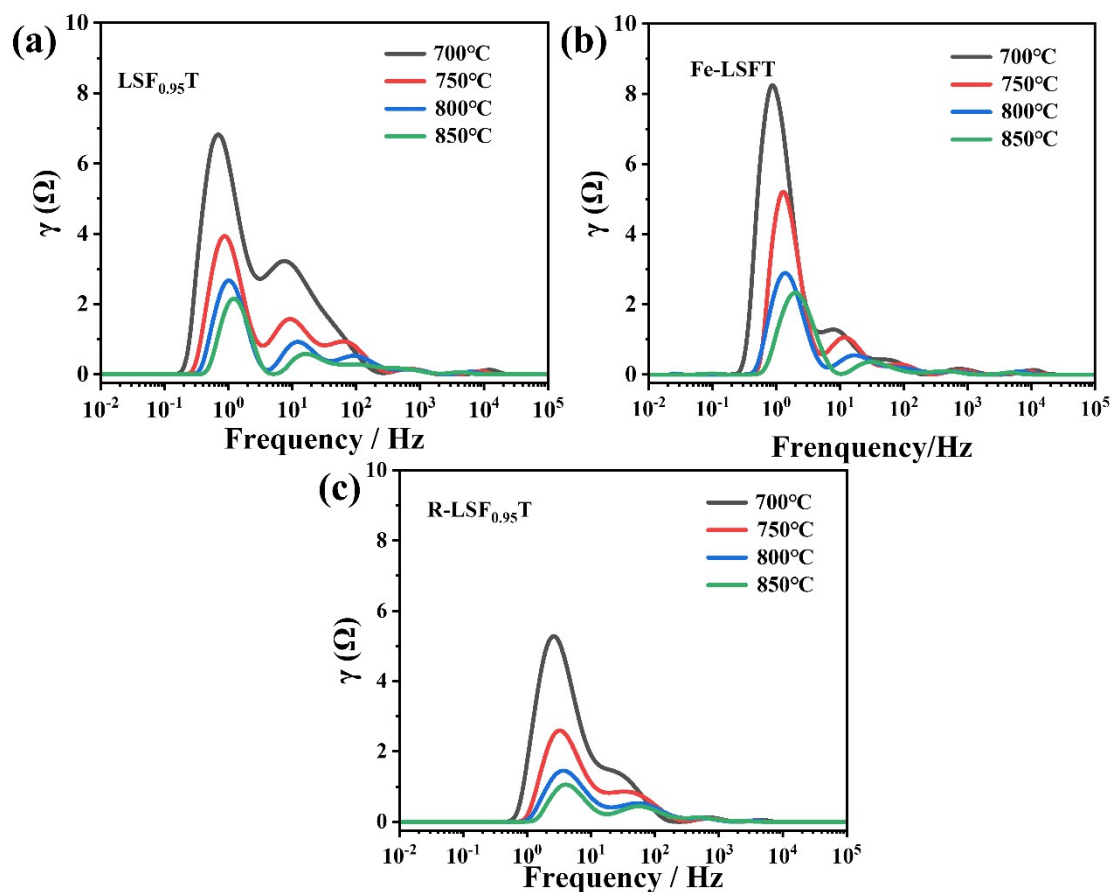

Fig. S4 DRT analysis on  $R_p$  of (a)  $\text{LSF}_{0.95}\text{T}$ , (b) Fe-LSFT or (c) R- $\text{LSF}_{0.95}\text{T}$  at 700-850 °C.

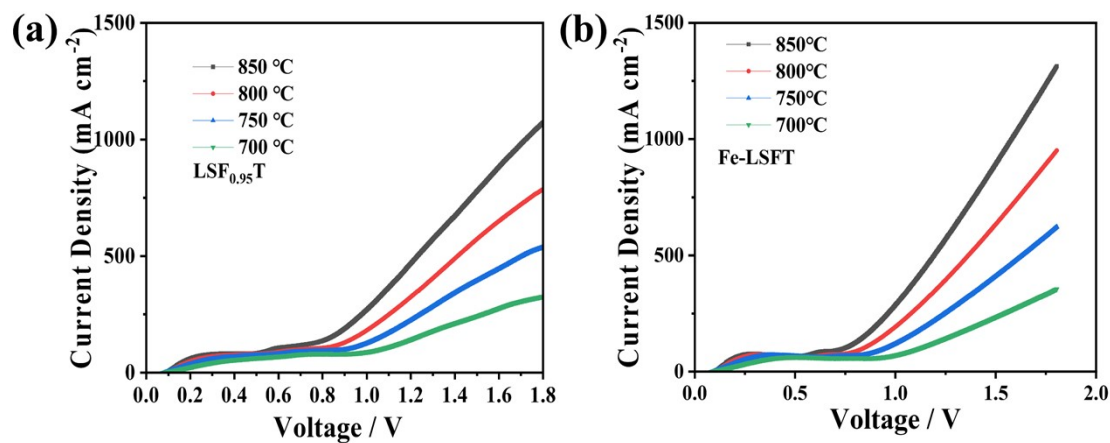

Fig. S5 LSV curves of cells with (a)  $\text{LSF}_{0.95}\text{T}$  and (b) Fe-LSFT cathode at 700-850 °C.
